# Supplementary material
Source: Springer Nature journal article supplement (https://www.springermedizin.de/resource/supplementary/12890_2004_30_MOESM2_ESM.pdf/9505832)

■ Young Asthmatics    □ Asthma aged >40

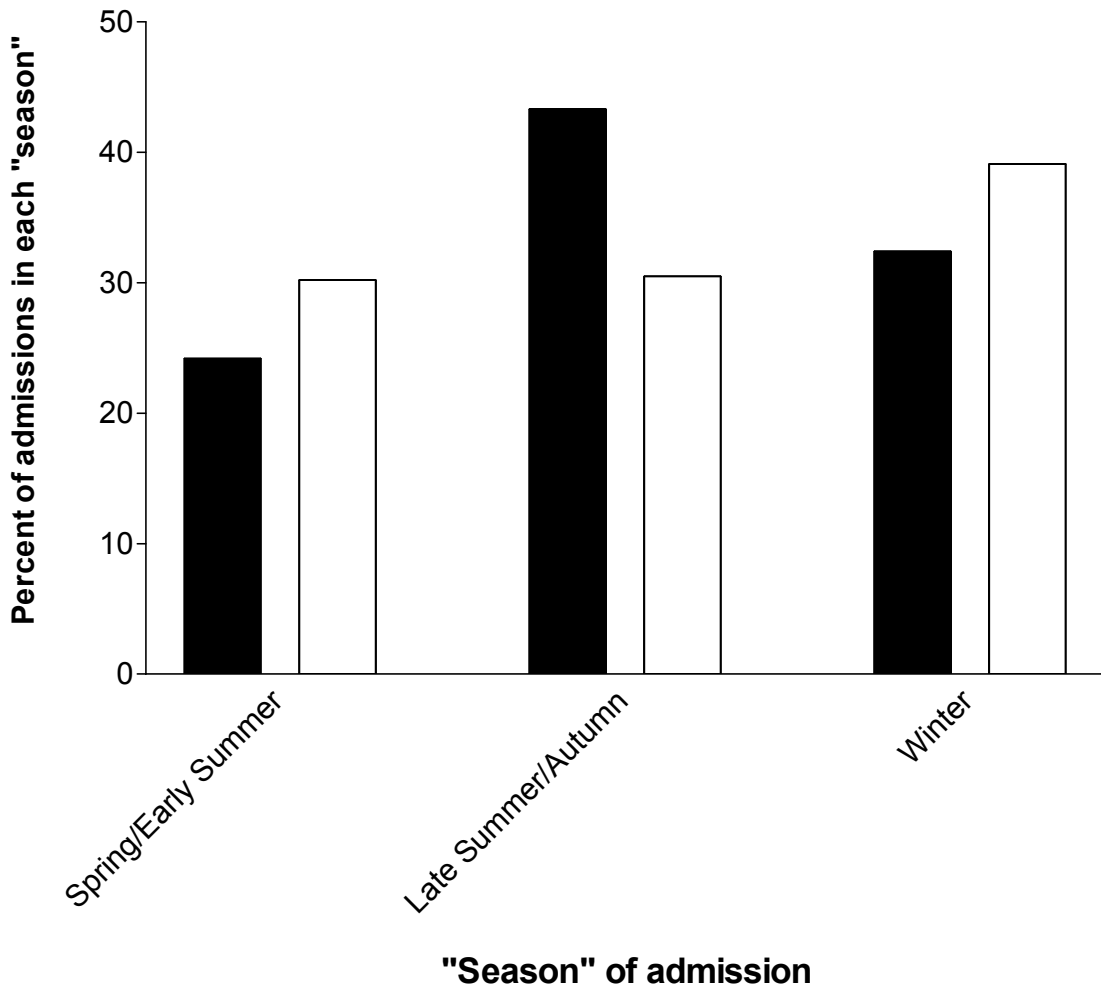

Supplement: MOESM2 [file 9505832]
